# Supplementary material
Source: PubMed Central journal article supplement (PMC10071402)
Supplement: sj-pdf-1-jhc-10.1369_00221554231158428.pdf [file sj-pdf-1-jhc-10.1369_00221554231158428.pdf]

Thioflavin S is Unique to Mixed Tauopathies

## **Thioflavin Staining and Amyloid Formation are Unique to Mixed Tauopathies**

Kimberly L. Fiock MS<sup>1,2,\*</sup>, Ryan K. Betters<sup>1,3,4</sup>, and Marco M. Hefti MD<sup>1,2,4</sup>

<sup>1</sup>Department of Pathology, University of Iowa, 500 Newton Road, 1157ML, Iowa City, IA 52242

<sup>2</sup>Experimental Pathology Graduate Program, University of Iowa, Iowa City, IA

<sup>3</sup>Interdisciplinary Neuroscience Graduate Program, University of Iowa, Iowa City, IA

<sup>4</sup>Iowa Neuroscience Institute, Iowa City, IA

\*To whom correspondence should be addressed.

### **CORRESPONDING AUTHOR INFORMATION:**

Kimberly Fiock, MS

Email: [kimberly-fiock@uiowa.edu](mailto:kimberly-fiock@uiowa.edu)

Phone: +1-319-335-8427

Fax: +1-319-335-8453

**Supplementary Figure 1.**

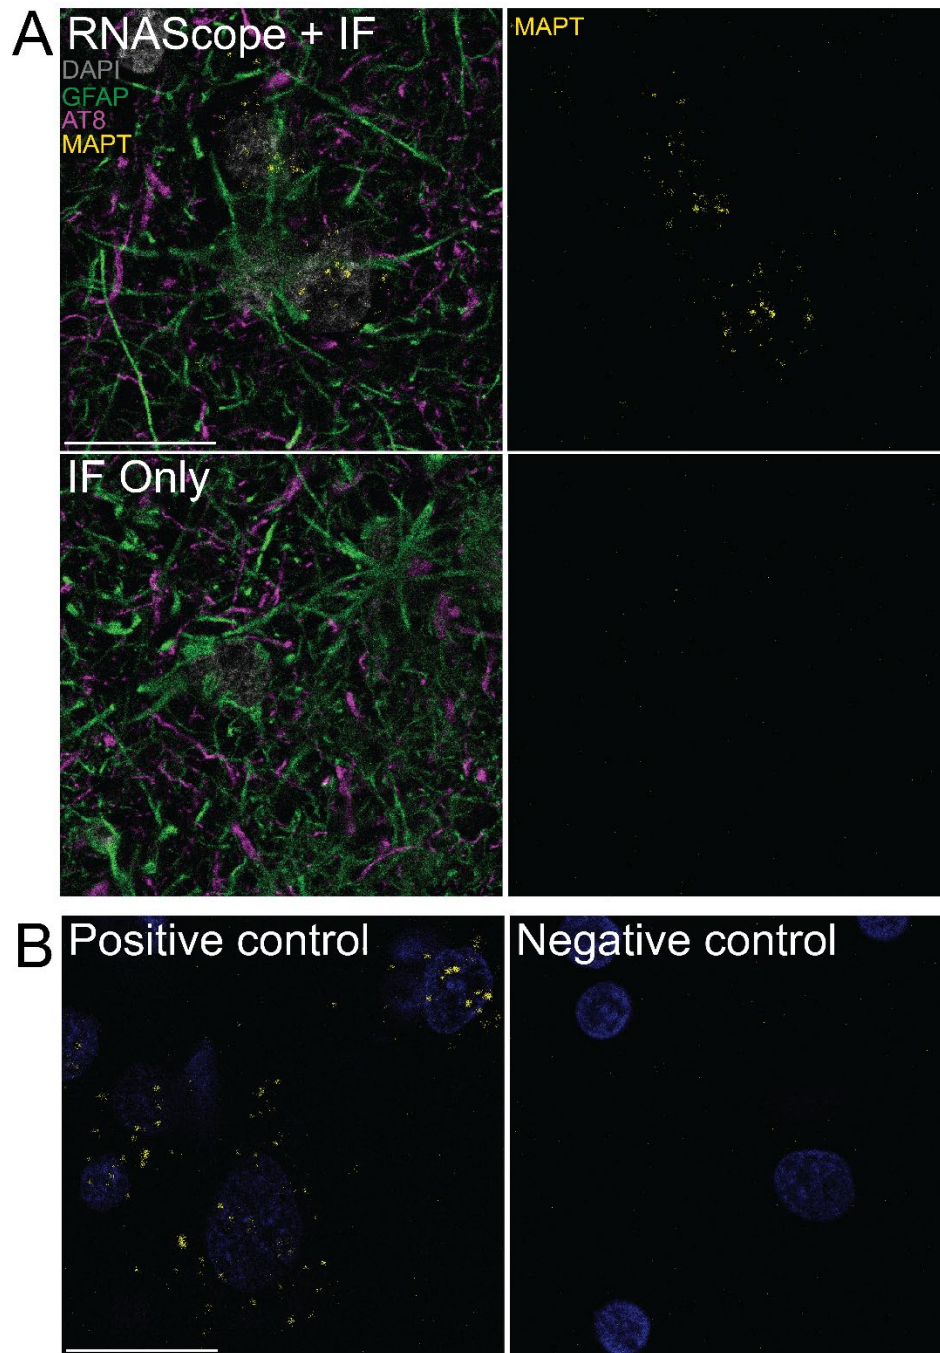

**Supplementary Figure 1.**

Validation of RNAscope and immunofluorescence staining techniques. (A) Immunofluorescence staining without *MAPT* probe (yellow) shows no *in situ* hybridization signal compared to adjacent region on the same slide of human brain tissue stained with probe. (B) Further validation using manufacturer provided positive (yellow) and negative control probes on adjacent regions on the same slide of human brain tissue. DAPI (blue) was used to highlight nuclei. Scale bar= 20 $\mu$ m for both (A) and (B).

Thioflavin S is Unique to Mixed Tauopathies

## Supplementary Figure 2. Quantification code

```
ds=imageDatastore('Binarized Images\');           %create an image store of Cy5 images
file_names=ds.Files;                             %read file names
[a,b]=size(file_names);                          %determine how many files there are
Cy5=zeros([a,1]);                                %initialize the vector (saves processing
time)
for i=1:a
    I=readimage(ds,i);                            %read image i
    x=nnz(I);                                     %calculate the number of non-zero pixels
                                                in the %thresholded image
    Cy5(i,1)=x;                                  %add to vector
end
```

```
%create a vector for the diagnoses, transpose it to a vertical, and turn it into a categorical
Dx=["AD" "PSP" "CBD" "Control" "Control" "AD" "Control" "AD" "CBD" "CBD" "PSP" "PSP"];
Dx=Dx';
Dx=categorical(Dx);
```

```
%%create indices for each diagnosis
```

```
idx_AD=Dx=="AD";
idx_CBD=Dx=="CBD";
idx_PSP=Dx=="PSP";
idx_Con=Dx=="Control";
```

```
%%run ANOVA to check if any comparison is significant.
```

```
[~,~,stats]=anova1(Cy5,Dx);
```

```
%%run multcompare to figure out which
```

```
[c,~,~,gnames]=multcompare(stats);
tbl = array2table(c,"VariableNames", ...
    ["Group A","Group B","Lower Limit","A-B","Upper Limit","P-value"]);
tbl("Group A") = gnames(tbl("Group A"));
tbl("Group B") = gnames(tbl("Group B"))
```

```
%generate the plot
```

```
scatter(1,Cy5(idx_Con),"black","filled")
hold on
scatter(2,Cy5(idx_AD),"black","filled")
scatter(3,Cy5(idx_CBD),"black","filled")
scatter(4,Cy5(idx_PSP),"black","filled")
ylabel("Number of Positive Pixels")
```

## Thioflavin S is Unique to Mixed Tauopathies

```
xlabel("")
xticks([1 2 3 4])
xticklabels({'Control' 'AD' 'CBD' 'PSP'})
xlim([0.5 4]);
line([1 2],[29000 29000])
text(1.5,30000,"p="+round(tbl{2,6},4,"significant'),'HorizontalAlignment','center')
line([2 3],[28000 28000])
text(2.5,29000,"p="+round(tbl{3,6},4,"significant'),'HorizontalAlignment','center')
line([2 4],[30000 30000])
text(3.5,3.1e4,"p="+round(tbl{1,6},4,"significant'),'HorizontalAlignment','center')
hold off
```

**Supplementary Figure 3.**

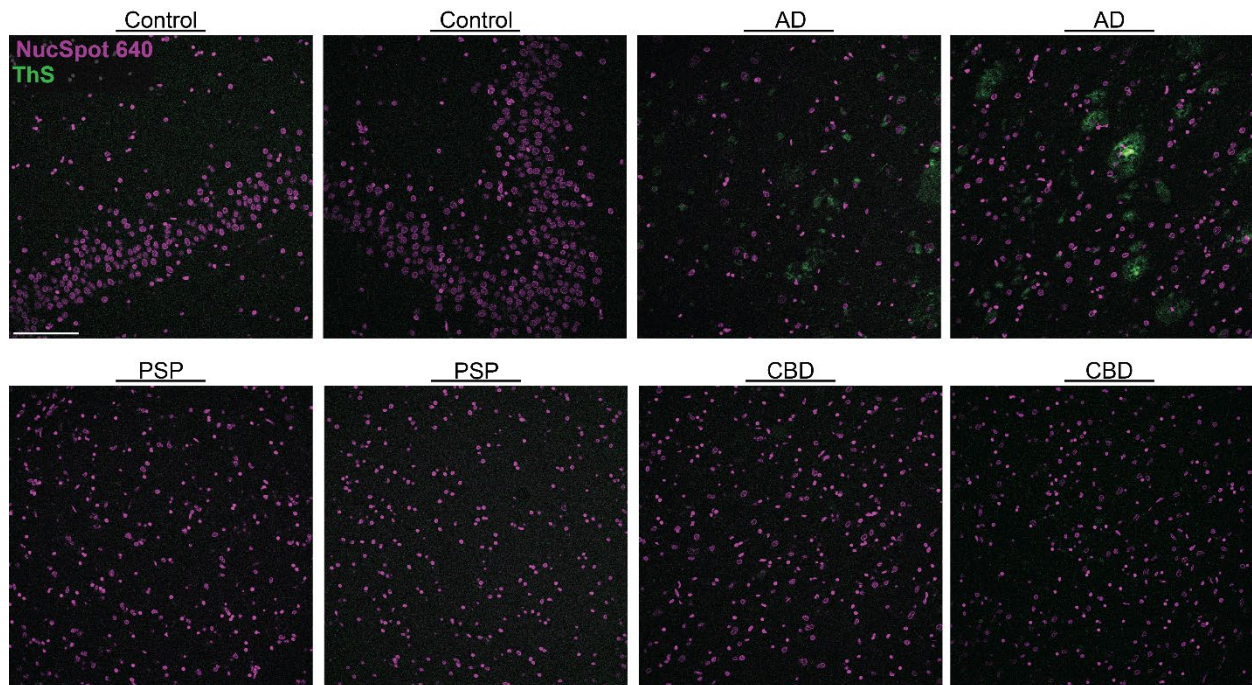

**Supplementary Figure 3.**

Validation of thioflavin S staining pattern using alternative source of thioflavin S (see methods). Thioflavin staining (green) is present in AD but is not found in control, PSP, or CBD. NucSpot 640 (magenta) was used to highlight nuclei. Two cases are shown per disease (total n=8). Scale bar= 50 $\mu$ m. Abbreviations: *AD* Alzheimer disease; *PSP* progressive supranuclear palsy; *CBD* corticobasal degeneration; *ThS* thioflavin S

Thioflavin S is Unique to Mixed Tauopathies

**Supplementary Table 1.** Quantification of colocalization using FIJI BIOP JACOP to calculate Mander's M1/M2 and Pearson's correlation coefficients for images shown in main text Fig. 2.

| Case ID | Pathologic Diagnosis | Area A | Area B | Area Overlap | Pearson's Coefficient |
|---------|----------------------|--------|--------|--------------|-----------------------|
| #3      | Control              | 0.012  | 0.856  | 0            | -3.15E-04             |
| #8      | AD                   | 81.496 | 18.834 | 9.876        | 0.288                 |
| #13     | PSP                  | 5.346  | 2.067  | 0.047        | 0.016                 |
| #20     | CBD                  | 6.455  | 8.827  | 0.163        | 0.02                  |
| #22     | PiD                  | 10.668 | 0.093  | 3.86E-04     | -8.35E-04             |
| #24     | ALS and PART         | 9.992  | 8.778  | 1.684        | 0.245                 |

| Case ID | M1       | M2       | Threshold A | Threshold B | Thresholded M1 | Thresholded M1 |
|---------|----------|----------|-------------|-------------|----------------|----------------|
| #3      | 1.11E-04 | 1.53E-04 | 92          | 37          | 0              | 0              |
| #8      | 0.331    | 0.641    | 116         | 97          | 0.126          | 0.531          |
| #13     | 0.049    | 0.039    | 98          | 37          | 0.01           | 0.023          |
| #20     | 0.128    | 0.032    | 111         | 37          | 0.027          | 0.019          |
| #22     | 4.47E-04 | 0.029    | 116         | 31          | 3.23E-05       | 0.003          |
| #24     | 0.272    | 0.203    | 139         | 37          | 0.176          | 0.302          |

*AD* Alzheimer's disease; *PSP* Progressive supranuclear palsy; *CBD* Corticobasal degeneration; *PiD* Pick's disease; *ALS* Amyotrophic lateral sclerosis; *PART* Primary age-related tauopathy
